# Supplementary material
Source: publisher figshare collection journal article supplement (https://frontiersin.figshare.com/ndownloader/files/12358421)
Supplement: Supplementary file 1 [file 12358421]

**Supplement Tab. 3** NLFA pattern of *P. fimata* when consuming different *C. elegans* feeding strains (nmol/mg dry weight)

| **NLFA** | **Wild type** | | ***fat-1*** | | ***fat-2*** | | ***fat-2* + EPA** | | **Significance*** |
| --- | --- | --- | --- | --- | --- | --- | --- | --- | --- |
| Mean | SD | Mean | SD | Mean | SD | Mean | SD |
| **14:0** | 5.55 | *2.52* | 4.54 | *0.74* | 2.85 | *0.31* | 4.32 | *0.39* |  |
| **14:0 iso** | 4.04 | *0.34* | 4.56 | *4.02* | 2.64 | *0.14* | 3.68 | *0.25* |  |
| **14:1 ω7c** | 0.00 a | *0.00* | 0.00 a | *0.00* | 0.34 a | *0.58* | 2.52 b | *0.83* | F3,8 = 17.29 (p < 0.001) |
| **14:1 ω9c** | 2.19 | *0.80* | 0.00 | *0.00* | 3.35 | *1.75* | 1.06 | *1.50* |  |
| **15:0** | 3.35 | *1.27* | 3.67 | *0.92* | 2.81 | *0.91* | 2.66 | *0.33* |  |
| **15:0 iso** | 10.57 a | *1.91* | 16.06 a,b | *4.30* | 17.80 a,b | *3.75* | 21.68 b | *1.50* | F3,8 = 6.64 (p = 0.015) |
| **16:0** | 48.69 | *22.25* | 56.62 | *18.30* | 38.43 | *3.60* | 46.32 | *4.35* |  |
| **16:0 iso** | 4.39 a | *0.29* | 7.74 b | *2.08* | 2.14 a | *0.10* | 2.37 a | *0.35* | F3,8 = 17.74 (p < 0.001) |
| **16:1 ω5c** | 4.06 a | *1.22* | 0.00 b | *0.00* | 1.27 b | *0.11* | 3.53 a | *0.97* | F3,8 = 17.91 (p < 0.001) |
| **16:1 ω7c** | 26.67 | *6.81* | 25.91 | *8.52* | 20.44 | *1.79* | 22.73 | *3.83* |  |
| **17:0** | 4.67 | *0.50* | 3.91 | *0.96* | 2.91 | *0.32* | 3.27 | *0.29* |  |
| **17:0 cyclo w7c** | 10.77 a | *0.83* | 18.77 a | *5.46* | 34.22 b | *6.60* | 35.57 b | *2.21* | F3,8 = 22.19 (p < 0.001) |
| **17:0 iso** | 9.92 a | *1.12* | 11.00 a | *2.17* | 18.76 b | *1.24* | 21.43 b | *0.74* | F3,8 = 48.20 (p < 0.001) |
| **17:1 ω8c** | 6.69 | *0.07* | 5.76 | *1.13* | 4.86 | *1.29* | 5.36 | *1.13* |  |
| **18:0** | 13.14 | *5.78* | 11.90 | *3.10* | 8.46 | *1.21* | 7.27 | *6.76* |  |
| **18:1 ω5** | 4.15 | *1.94* | 2.93 | *0.49* | 3.01 | *0.29* | 4.95 | *0.06* |  |
| **18:1 ω7** | 42.79 a | *9.23* | 33.72 a | *7.21* | 52.58 a,b | *8.68* | 71.89 b | *0.65* | F3,8 = 15.08 (p = 0.001) |
| **18:1 ω9** | 134.12 | *47.67* | 126.22 | *21.78* | 119.42 | *22.78* | 115.12 | *1.89* |  |
| **18:2 ω6** | 58.95 a | *21.12* | 45.99 a,b | *9.68* | 25.99 b | *0.54* | 25.91 b | *0.07* | F3,8 = 5.83 (p = 0.021) |
| **18:3 ω6** | 9.16 | *3.23* | 19.48 | *5.87* | 9.07 | *4.85* | 11.08 | *8.22* |  |
| **19:0 cyclo** | 6.09 a | *1.44* | 9.26 a | *2.19* | 17.64 b | *1.65* | 19.17 b | *0.99* | F3,8 = 45.90 (p < 0.001) |
| **20:0** | 8.51 a | *0.95* | 4.48 b | *1.86* | 3.40 b | *0.15* | 3.98 b | *0.77* | F3,8 = 12.98 (p = 0.002) |
| **20:1 ω6** | 2.84 a | *0.76* | 1.13 b | *0.59* | 2.14 a,b | *0.13* | 3.01 a | *0.64* | F3,8 = 6.47 (p = 0.016) |
| **20:1 ω9** | 1.81 a | *0.11* | 0.96 b | *0.37* | 1.97 a | *0.15* | 2.21 a | *0.21* | F3,8 = 16.46 (p < 0.001) |
| **20:2 ω6** | 5.83 a | *0.19* | 3.24 b | *0.96* | 1.18 c | *0.09* | 1.42 c | *0.42* | F3,8 = 48.50 (p < 0.001) |
| **20:3 ω6** | 7.81 a | *0.28* | 10.85 a | *2.50* | 1.70 b | *0.28* | 2.03 b | *0.20* | F3,8 = 37.48 (p < 0.001) |
| **20:4 ω6** | 11.42 a | *1.01* | 37.97 b | *8.13* | 5.16 a | *0.28* | 6.34 a | *0.44* | F3,8 = 42.27 (p < 0.001) |
| **20:5 ω3** | 24.53 a | *0.84* | 6.53 b | *1.15* | 5.82 b | *0.86* | 10.63 c | *0.54* | F3,8 = 296.71 (p < 0.001) |

* Results of one-way ANOVA followed by Bonferroni's post-hoc comparisons test. Letters behind the mean values indicate
significant differences. NLFA – Neutral lipid fatty acids, EPA – Eicosapentaenoic acid, 80 µM; SD – Standard deviation (n = 3).
